# Supplementary material for: Adverse birth outcomes and associated factors among mothers who delivered in Bale zone hospitals, Oromia Region, Southeast Ethiopia
Source: PubMed Central journal article supplement — J Int Med Res. 2021 May 14;49(5):03000605211013209. doi: 10.1177/03000605211013209 (PMC8371032; doi:10.1177/03000605211013209), 2021-05-14
Supplement: sj-pdf-1-imr-10.1177_03000605211013209.pdf [file sj-pdf-1-imr-10.1177_03000605211013209.pdf]

## ANNEX II

### English version Questionnaire

|                                        |                                                                                                                  |  |
|----------------------------------------|------------------------------------------------------------------------------------------------------------------|--|
| Q101. Age                              |                                                                                                                  |  |
| Q102. Religion                         | 1. Muslim<br>2. Orthodox<br>3. Protestant<br>4. Other                                                            |  |
| Q103. Educational status of the mother | 1. Illiterate<br>2. Only reading and writing<br>3. Primary school<br>4. Secondary school<br>5. College and above |  |
| Q104. Marital status                   | 1. Married<br>2. Single<br>3. Divorced                                                                           |  |
| Q105. Ethnicity                        | 1. Oromo<br>2. Amhara<br>3. South nation nationality and<br>4. peoples of Ethiopia<br>5. Other                   |  |
| Q106. Residence                        | 1. Urban<br>2. Rural                                                                                             |  |
| Q107. Mother occupation                | 1. House wife<br>2. Merchant<br>3. Daily labourer                                                                |  |

|  |                                               |  |
|--|-----------------------------------------------|--|
|  | 4.Government employee<br>5.Student<br>6.Other |  |
|--|-----------------------------------------------|--|

**Section II.**Obstetric related characteristics of mothers

|                                                         |                                                              |  |
|---------------------------------------------------------|--------------------------------------------------------------|--|
| Q108. Status of newborn at birth                        | 1. Live birth<br>2.Still birth                               |  |
| Q109. Birth weight of live birth                        | _____grams                                                   |  |
| Q110. Gestational age                                   | _____ weeks                                                  |  |
| Q111. Visible birth defect                              | 1.Yes<br>2.No                                                |  |
| Q112. Gravidity                                         | 1.Primigravida<br>2.Multigravida                             |  |
| Q113.Inter-pregnancy interval                           | _____ months                                                 |  |
| Q114. Pregnancy status                                  | 1.Wanted<br>2.Unwanted                                       |  |
| Q115. ANC follow up                                     | 1.Yes<br>2.No                                                |  |
| Q116. If your answer to above is yes when did you start | 1.First trimester<br>2.Second trimester<br>3.Third trimester |  |
| Q117. Number of ANC follow up                           | _____                                                        |  |
| Q118.Folic acid supplementation                         | 1.Yes<br>2.No                                                |  |
| Q119. Current pregnancy complication                    | 1.Yes<br>2.No                                                |  |
| Q120. If your answer to above Qs is yes what type of    | 1.PIH<br>2.PROM                                              |  |

|                                                                                 |                                                                                  |  |
|---------------------------------------------------------------------------------|----------------------------------------------------------------------------------|--|
| complication during pregnancy happen                                            | 3.APH<br>4.Other (specify                                                        |  |
| Q121. Complication of labour                                                    | 1.Yes<br>2.No                                                                    |  |
| Q122. If your answer to above Qs is yes what type of labour complication happen | 1.Prolonged labour<br>2.Obstructed labour<br>3.Mal position<br>4.Other (specify) |  |
| Q123. Status of labour                                                          | 1.Spontaneous<br>2.Induced                                                       |  |
| Q124. Mode of delivery                                                          | 1.SVD<br>2.Caesarean section<br>3.Instrumental delivery                          |  |
| Q125. Contraceptive prior current pregnancy                                     | 1.Yes<br>2.No                                                                    |  |
| Q126. If your answer to above Qs is yes what type of Contraceptive did you use  | 1.Depo-Provera<br>2.Implanon<br>3.IUCD<br>4.Other ( specify                      |  |
| Q127. Previous poor obstetric history                                           | 1.No<br>2.Perinatal death<br>3.Abortion<br>4.Preterm<br>5.LBW                    |  |

---

**Section III: medical illness and behaviours of the respondents**

|                                                                                   |                                                                      |  |
|-----------------------------------------------------------------------------------|----------------------------------------------------------------------|--|
| Q128. Medical illness                                                             | 1. Yes<br>2. No                                                      |  |
| Q129. If your answer to above Qs is yes what type of medical illness did you face | 1. Hypertension<br>2. HIV<br>3. DM<br>4. Malaria<br>5. UTI<br>5. CHF |  |
| Q130. Hgb                                                                         | _____                                                                |  |
| Q131. Alcohol use                                                                 | 1. Never<br>2. Daily<br>3. Weekly<br>4. Occasionally                 |  |
| Q132. Caffeine use                                                                | 1. Never<br>2. Daily<br>3. Weekly<br>4. Occasionally                 |  |
